# Supplementary material for: Efficacy of interventions that include diet, aerobic and resistance training components for type 2 diabetes prevention: a systematic review with meta-analysis
Source: PubMed Central journal article supplement (PMC3898566; doi:10.1186/1479-5868-11-2), 2014-01-15
Supplement: 1479-5868-11-2-S1.pdf [file 1479-5868-11-2-S1.pdf]

## Additional file 1. Risk of bias assessment explanation

10-item risk of bias assessment criteria and an explanation of the scoring details for each item

| Criteria                                                                                                                       | Yes                                                                                                                              | No                                                                             |
|--------------------------------------------------------------------------------------------------------------------------------|----------------------------------------------------------------------------------------------------------------------------------|--------------------------------------------------------------------------------|
| i) Did the study report a power calculation and was the study adequately powered to detect intervention effects?               | If a power calculation was provided and the sample size allowed for detection of intervention effects.                           | If power calculation was not provided or sample size was inadequate.           |
| ii) Was the randomization procedure adequately described and carried out?                                                      | If a random assignment sequence was used and described (computer generated random number tables; use of sealed opaque envelopes. | If the process was not random or adequately described.                         |
| iii) Did the study include a control group? (randomized participants not a comparison group)                                   | If the study contained a control group (or usual care group) with randomized participants.                                       | If allocation was not random or there was a treatment.                         |
| iv) Did the study present baseline characteristics separately for treatment groups?                                            | If baseline characteristics were presented separately.                                                                           | If baseline characteristics were not presented separately.                     |
| v) Did the study analyses account for potential differences at baseline?                                                       | If the statistical procedures accounted for potential differences at baselines e.g. ANOVA or ANCOVA.                             | If statistical measures did not account for potential differences at baseline. |
| vi) Were the assessors blinded to treatment allocation at baseline and post-test?                                              | If assessors were blinded to participant allocation at baseline and posttest.                                                    | If assessors were not blinded to participant allocation.                       |
| vii) Did the study have a dropout of <20% (<6 month follow-up) or <30% (>6 month follow-up) for the primary outcome of weight? | If dropout was <20% for <6 months studies or <30% for studies >6 months.                                                         | If dropout was >20% for <6 months studies or >30% for studies >6 months        |
| viii) Did the study use an intention to treat analysis?                                                                        | If intention to treat analyses was used.                                                                                         | If intention to treat analyses was not used.                                   |
| ix) Did the study report summary results for each group?                                                                       | If summary results for each group were presented.                                                                                | If no summary results were presented.                                          |
| x) Did the study report precision estimates (e.g., 95% confidence interval) and/or effect sizes?                               | If precision estimates and/or effect sizes were included.                                                                        | If precision estimates and/or effect sizes were not included.                  |
