# Supplementary material for: Efficacy of interventions that include diet, aerobic and resistance training components for type 2 diabetes prevention: a systematic review with meta-analysis
Source: PubMed Central journal article supplement (PMC3898566; doi:10.1186/1479-5868-11-2), 2014-01-15
Supplement: 1479-5868-11-2-S2.pdf [file 1479-5868-11-2-S2.pdf]

## Additional file 2. Characteristics of included studies

| Author, year and study name                                                                                                                                                                                                                      | Design                   | Participants                                                                                                              | Intervention groups (n)<br>Intervention Length<br>Follow up                                                                                                                                                                                                                                                                                                                                                                                                | Description of dietary intervention                                                                                                                                                                                                                                                                                                                                                                         | Description of exercise intervention                                                                                                                                                                                                                                                                                                                                                                                              |
|--------------------------------------------------------------------------------------------------------------------------------------------------------------------------------------------------------------------------------------------------|--------------------------|---------------------------------------------------------------------------------------------------------------------------|------------------------------------------------------------------------------------------------------------------------------------------------------------------------------------------------------------------------------------------------------------------------------------------------------------------------------------------------------------------------------------------------------------------------------------------------------------|-------------------------------------------------------------------------------------------------------------------------------------------------------------------------------------------------------------------------------------------------------------------------------------------------------------------------------------------------------------------------------------------------------------|-----------------------------------------------------------------------------------------------------------------------------------------------------------------------------------------------------------------------------------------------------------------------------------------------------------------------------------------------------------------------------------------------------------------------------------|
| <b>Author</b><br>Bersoux et al 2010<br><b>SN:</b> DEAL study                                                                                                                                                                                     | single group<br>pre-post | IFG and/or<br>IGT<br><br>n = 47 <sup>#</sup><br><br>M: n = 21*<br>F: n = 71*<br><br>Age (mean ±<br>SD) = 62 ±<br>12 years | <b>Groups</b><br>lifestyle INT group only<br><b>Intervention</b><br>1 yr<br><b>Mode</b><br>group face to face<br><b>Follow up</b><br>nil                                                                                                                                                                                                                                                                                                                   | - weight loss goal of 7%<br>- information sessions on healthful food choices, food labels, portion control, dining out healthy, shopping for healthful foods, decreasing dietary fat, food records and goal setting                                                                                                                                                                                         | - Initial supervised one on one sessions with physical therapist (1 week) to develop exercise program, then self-directed for remainder of study<br>- 150 min PA.wk <sup>-1</sup><br>- personalised exercise program that emphasised aerobic exercise<br>- instructed to perform RT for upper extremity, lower extremity and core muscle groups<br>- flexibility exercises included<br>- pedometer: 10000 steps.day <sup>-1</sup> |
| <b>Author</b><br>Burtscher et al 2009                                                                                                                                                                                                            | two group<br>comparison  | IFG<br><br>n = 36 <sup>#</sup><br><br>M: n = 20*<br>F: n = 16*<br><br>Age (mean ±<br>SD) = 57.5 ±<br>6.9 years            | <b>Groups</b><br>counselling only INT n =<br>18 and counselling +<br>supervised exercise INT n<br>= 18<br><b>Intervention</b><br>1 yr<br><b>Mode</b><br>individual face to face<br><b>Follow up</b><br>nil                                                                                                                                                                                                                                                 | <b>Both groups</b><br>- weight loss goal of 5%<br>- achieve diet where total fat intake < 30% and saturated fat intake < 10%                                                                                                                                                                                                                                                                                | <b>Both groups</b><br>- moderate intensity PA for 30 min.day <sup>-1</sup><br><b>Counselling + supervised exercise group</b><br>- supervised, progressive, individually tailored aerobic exercise program and circuit-type RT sessions for 1 hour two times.wk <sup>-1</sup> (6-8 strength training exercises with 8-12 repetitions)                                                                                              |
| <b>Authors</b><br>Lindstrom et al 2003,<br>(Eriksson et al 1999<br>(Laaksonen et al 2005,<br>Lindstrom et al 2006,<br>Lindstrom et al 2003b,<br>Tuomilehto et al 2001,<br>Uusitupa et al 2003,<br>Uusitupa et al 2000)<br><b>SN:</b> Finnish DPS | RCT                      | IGT<br><br>n = 434 <sup>#</sup><br><br>M: n = 172*<br>F: n = 350*<br><br>Age (mean ±<br>SD) = 55 ± 7<br>years             | <b>Groups</b><br>lifestyle INT (n = 231) and<br>CON (n = 203, single<br>education session at<br>baseline)<br><b>Intervention length</b><br>median of 4 yr across the<br>5 study centres<br>Note: Data for 3 yr used<br>as the 4 yr results were<br>only presented as means.<br><b>Mode</b><br>individual face to face<br><b>Follow up</b><br>median of 7 yr<br>Note: data not reported in<br>original article as a<br>specific time-point of<br>follow up. | - BMI goal of < 25 kg.m <sup>-2</sup> (> 5% weight loss)<br>- diet comprising > 50% carbohydrates,<br>< 30% fat (< 10% saturated fat, < 20% from<br>mono-unsaturated and poly-unsaturated fat), 1 g<br>protein.kg <sup>-1</sup> ideal body weight<br>- < 300 mg.day <sup>-1</sup> cholesterol<br>- > 15 g fibre per 1000 kcal<br>- VLCD was implemented if BMI at 6 months<br>still > 30 kg.m <sup>-2</sup> | - moderate intensity aerobic exercise for at least<br>30 min.day <sup>-1</sup><br>- supervised progressive, individually tailored<br>circuit-type resistance training 2 days.wk <sup>-1</sup> .<br>Exercises included RT for large muscle groups of<br>the upper and lower body                                                                                                                                                   |

| Author, year and study name                            | Design | Participants                                                                                                                                                              | Intervention groups (n)<br>Intervention Length<br>Follow up                                                                                                                                                                                                                                                                                                                           | Description of dietary intervention                                                                                                                                                                                                                                                                                                                                                                                                                                                                 | Description of exercise intervention                                                                                                                                                                                                                                                                                                                                                                           |
|--------------------------------------------------------|--------|---------------------------------------------------------------------------------------------------------------------------------------------------------------------------|---------------------------------------------------------------------------------------------------------------------------------------------------------------------------------------------------------------------------------------------------------------------------------------------------------------------------------------------------------------------------------------|-----------------------------------------------------------------------------------------------------------------------------------------------------------------------------------------------------------------------------------------------------------------------------------------------------------------------------------------------------------------------------------------------------------------------------------------------------------------------------------------------------|----------------------------------------------------------------------------------------------------------------------------------------------------------------------------------------------------------------------------------------------------------------------------------------------------------------------------------------------------------------------------------------------------------------|
| <b>Author</b><br>McAuley et al 2002, (Dale et al 2009) | RCT    | IGT<br><br>n = 77 <sup>#</sup><br><br>n = 43<br>completed 2 year follow up (See Note)<br><br>M: n = 26*<br>F: n = 53*<br><br>Age (mean and range) = 43.3 [30-38] years    | <b>Groups</b><br>intensive lifestyle INT (n = 25), moderate lifestyle intervention (n = 29) CON (n = 23, 2 week education after 4 month intervention)<br><b>Intervention length</b><br>4 months<br><b>Mode</b><br>individual face to face<br><b>Follow up</b><br>2 yr<br><br>NOTE: intensive and modest INT groups collapsed into single intervention group after 4 month assessments | <b>Modest program</b><br>- diet comprising 50% carbohydrates, 32% fat (11% saturated fat, 14% monounsaturated fat, 7% polyunsaturated fat) and 18% protein<br>- cholesterol 200 mg.day <sup>-1</sup><br>- dietary fiber 25 g.day <sup>-1</sup><br><b>Intensive program</b><br>- diet comprising 55% carbohydrates 26% fat (6% saturated fat, 13% monounsaturated fat, 7% polyunsaturated fat ) and 18% protein)<br>- cholesterol 140 mg.day <sup>-1</sup><br>- dietary fiber 35 g.day <sup>-1</sup> | <b>Modest group</b><br>- 30 min.day <sup>-1</sup> of PA for 5 days.wk <sup>-1</sup><br>- NB no RT<br><b>Intensive group</b><br>- individual and group exercise sessions<br>- supervised by exercise consultant (at least once per week)<br>- 20 min.day <sup>-1</sup> of PA at 80-90% for max heart rate<br>- gym membership to encourage vigorous PA and resistance training at least 2 days.wk <sup>-1</sup> |
| <b>Authors</b><br>Page et al 1993 & Page et al 1992    | RCT    | IGT<br><br>n = 25 <sup>#</sup><br><br>n = 23<br>completed 2 year follow up<br><br>M: n = 17*<br>F: n = 8*<br><br>Age (mean ± SD) = INT 39 ± 11 years vs CON 40 ± 10 years | <b>Groups</b><br>lifestyle INT groups for the first 6 wk with Diet only, exercise only, diet and exercise. Then all collapsed into Healthy Lifestyle INT group (n = 18), CON (n = 7, placebo pill). Drug group not included in analysis<br><b>Intervention Length</b><br>6 months<br><b>Mode</b><br>individual face to face<br><b>Follow up</b><br>2 yr                               | - reduction in energy intake (where appropriate) to achieve BMI goal < 25 kg.m-2<br>- diet comprising 50-55% carbohydrates and 30% fat<br>- poly-unsaturated:saturated fat ratio of 1.0<br>- fiber intake 20 g.1000 kcal <sup>-1</sup>                                                                                                                                                                                                                                                              | - 20 min of aerobic exercise for 3 days.wk <sup>-1</sup> (minimum)<br>- supervised exercise classes provided aerobic and anaerobic exercise, circuit training, swimming and aerobic weight training                                                                                                                                                                                                            |

| Author, year and study name                                                                                                                      | Design             | Participants                                                                                                                                                    | Intervention groups (n)<br>Intervention Length<br>Follow up                                                                                                                                                                                                                                                                                             | Description of dietary intervention                                                                                                                                                                                     | Description of exercise intervention                                                                                                                                                                                                                                                                                                                                                                                                                                                                                                                                                                                                                                                                                                                                                                                               |
|--------------------------------------------------------------------------------------------------------------------------------------------------|--------------------|-----------------------------------------------------------------------------------------------------------------------------------------------------------------|---------------------------------------------------------------------------------------------------------------------------------------------------------------------------------------------------------------------------------------------------------------------------------------------------------------------------------------------------------|-------------------------------------------------------------------------------------------------------------------------------------------------------------------------------------------------------------------------|------------------------------------------------------------------------------------------------------------------------------------------------------------------------------------------------------------------------------------------------------------------------------------------------------------------------------------------------------------------------------------------------------------------------------------------------------------------------------------------------------------------------------------------------------------------------------------------------------------------------------------------------------------------------------------------------------------------------------------------------------------------------------------------------------------------------------------|
| <b>Author</b><br>Payne et al 2008                                                                                                                | Quasi-experimental | at risk for diabetes and/or IGT or IFG<br><br>n = 122 <sup>#</sup><br><br>M: n = 58*<br>F: n = 64*<br><br>Age (mean ± SD) = 52.6 ± 8.6 years                    | <b>Groups</b><br>lifestyle + gym-based RT INT (n = 62) and lifestyle +home-based RT INT (n = 60)<br><b>Intervention length</b><br>1 yr<br><b>Mode</b><br>group face to face<br><b>Follow up</b><br>nil<br><br>Note: No between groups differences for key diabetes measures. Results are presented in manuscript as combined pre-post results at 1 year | - weight loss goal of >5%<br>- diet comprising < 30% fat and < 10% saturated fat                                                                                                                                        | <b>Both groups</b><br>- ≥ 150 min of weighted PA and ≥ 5 sessions of at least moderate PA.wk <sup>-1</sup><br><b>Gym-Based RT group</b><br>- supervised program<br>- 2-3 RT sessions.wk <sup>-1</sup> for 12 wk (wk 7-18 of 52 wk intervention). Sessions of 5 min low intensity aerobic warm-up, 45 min high intensity RT, 5 min of stretching cool down. RT program focused on selected major muscle groups and was incremental<br><b>Home-based RT group</b><br>- unsupervised program<br>- 2-3 RT sessions.wk <sup>-1</sup> for 12 wk (wk 7-18 of 52 wk intervention). Selection of exercises and progressions using body weight exercises and convenient hand-held weights (e.g., cans of food). Wk 13-18, theraband and swiss ball exercises added<br><b>- Both groups</b> were advised to continue the regime from wk 19-52 |
| <b>Authors</b><br>Roumen et al 2008, (Corpeleijn et al 2006, Mensink et al 2003a, Mensink 2003b, Roumen et al 2011)<br><b>SN:</b> The SLIM study | RCT                | high risk individuals for IGT<br><br>n = 106 <sup>#</sup><br><br>M: n = 75*<br>F: n = 72*<br><br>Age (mean ± SD) = INT 54.2 ± 5.8 years vs CON 58.4 ± 6.8 years | <b>Groups</b><br>lifestyle INT (n = 52) and CON (n = 54, brief general advice)<br><b>Intervention Length</b><br>3 yr<br><b>Mode</b><br>individual face to face<br><b>Follow up</b><br>nil                                                                                                                                                               | - weight loss goal of 5-7%<br>- diet comprising > 55% of total energy from carbohydrates, < 30-35% fat, < 10% saturated fat, 10-15% protein<br>- fiber > 3 g.MJ <sup>-1</sup><br>- cholesterol < 33 mg.MJ <sup>-1</sup> | - 30 min PA.day <sup>-1</sup> for at least 5 days.wk <sup>-1</sup><br>- access to a supervised exercise program with aerobic and resistance activities for 1 hour.wk <sup>-1</sup>                                                                                                                                                                                                                                                                                                                                                                                                                                                                                                                                                                                                                                                 |

| Author, year and study name                                              | Design | Participants                                                                                                                                        | Intervention groups (n)<br>Intervention Length<br>Follow up                                                                                                                                                      | Description of dietary intervention                                                                                                                       | Description of exercise intervention                                                                                                                                                                                                     |
|--------------------------------------------------------------------------|--------|-----------------------------------------------------------------------------------------------------------------------------------------------------|------------------------------------------------------------------------------------------------------------------------------------------------------------------------------------------------------------------|-----------------------------------------------------------------------------------------------------------------------------------------------------------|------------------------------------------------------------------------------------------------------------------------------------------------------------------------------------------------------------------------------------------|
| <b>Authors</b><br>Villareal 2006, (Villareal et al 2008, Villareal 2006) | RCT    | at risk for diabetes or IGT<br><br>n = 24 <sup>#</sup><br><br>M: n = 9*<br>F: n = 18*<br><br>Age (mean ± SD) = INT 71 ± 2 years vs CON 69 ± 1 years | <b>Groups</b><br>INT (n = 15) and CON (n = 9, instructed to maintain usual dietary and exercise patterns)<br><b>Intervention length</b><br>26 wk<br><b>Mode</b><br>group face to face<br><b>Follow up</b><br>nil | - energy deficit of 750 kcal.day <sup>-1</sup><br>- weight loss goal of 10%<br>- diet comprising approximately 50% carbohydrate, 30% fat and 20 % protein | - group exercise supervised training sessions, 3 non-consecutive days.wk <sup>-1</sup><br>- 90 min session comprising 15 min warm-up flexibility tasks, 30 min endurance exercise, 30 min strength training and 15 min balance exercises |

Authors - Where multiple publications per study are present, the main outcomes paper is listed first, followed by the remaining relevant articles in alphabetical order

Participants – results shown are based on the number of participants reported on in the main outcomes paper (i.e., completed intervention and/or follow up). \* Baseline sample (male and female), <sup>#</sup> sample that completed the intervention

**CON** - control group, **FPG** - Fasting Plasma Glucose, **IFG** - Impaired Fasting Glucose, **IGT** - Impaired Glucose Tolerance, **INT** - intervention group, **mg** - milligram, **MJ** - MegaJoule, **SN** - Study Name, **PA** - Physical Activity, **RCT** - Randomised Controlled Trial, **RT** - Resistance Training, **VLCD** - Very Low Calorie Diet, **wk** - week, **yr** – year, < - less than, > - greater than
